P1339

**ARTERIOVENOUS FISTULA AND BASILIC VEIN TRANSPOSITION IN ELDERLY PATIENTS ON HEMODIALYSIS: AN OBSERVATIONAL STUDY**

Vinant Bhargava<sup>1</sup>, Priti Meena<sup>1</sup>, Ambrish Satwik<sup>1</sup>, Apurv Srivastava<sup>1</sup>, A K Bhalla<sup>1</sup>, Ashwani Gupta<sup>1</sup>, Manish Malik<sup>1</sup>, Anurag Gupta<sup>1</sup>, V S Bedi<sup>1</sup>, Devinder Singh Rana<sup>1</sup>

<sup>1</sup>Sir Ganga Ram Hospital, Department of Nephrology, New Delhi, India

**Background and Aims:** With the increase in the life expectancy of chronic kidney disease in the older population (>60 years), the numbers requiring haemodialysis is progressively rising. The elderly population may be different from the younger in terms of non-suitable vessels for access creation, non-maturation, and vascular calcifications, and this may alter the outcomes of use of arteriovenous fistula (AVF). This study was conducted to analyse the outcomes of AVF in elderly patients (>60 years).

**Method:** Retrospective study was conducted in the Department of Nephrology at Sir Ganga Ram Hospital, New Delhi. Patients of more than 60 years of age in whom AVF was created from 1<sup>st</sup> January 2012 to 31<sup>st</sup> December 2016 were included in the study. Follow-up data of 3.5 years was analysed. The primary endpoint was to assess primary and secondary patency rates.

**Results:** A total of 300 patients were included in the study. The mean age was 63.8 years. Radiocephalic AVF (RCAVF) was the most common site of [69.8% (n = 210)], followed by brachiocephalic (BCAVF) in 25.2% (n = 75) and basilic vein transposition (BVT) in 5% (n = 15). At 12 months, overall survival of the AVF was 66.8%. At 42 months, the primary patency rate of RCAVF, BCAVF, and BVT was 50.6%, 52.6%, and 50.4% respectively. The commonest cause of access failure was thrombosis (20.4%) followed by non-maturation (9%). Vascular access abandonment was found least in BCAVF.

**Conclusion:** AVF remains the preferred vascular access for haemodialysis in the elderly population. Brachiocephalic AVF has higher primary and secondary patency rates. Thrombosis and failure of maturation are major concerns in the elderly AVF.
